# Supplementary material for: Mitochondrial Dynamics in the Drosophila Ovary Regulates Germ Stem Cell Number, Cell Fate, and Female Fertility
Source: PubMed Central journal article supplement (PMC7876242; doi:10.3389/fcell.2020.596819), 2021-01-28
Supplement: Data_Sheet_1.pdf [file Data_Sheet_1.pdf]

## *Supplementary Material*

### 1 Supplementary Tables

#### 1.1 Supplementary Table 1

**Table 1. List of *Drosophila* lines used in the study.**

| Function               | Gene/cell type affected | Genotype                                                            | Source  | Library   |
|------------------------|-------------------------|---------------------------------------------------------------------|---------|-----------|
| Control                | mCherry                 | y[1] sc[*] v[1] sev[21]; P{y[+t7.7] v[+t1.8]=VALIUM20-mCherry}attP2 | BL35758 | TRiP, V20 |
| Driver                 | Germ cells              | P{w[+mC]=UAS-Dcr-2.D}1, w[1118]; P{w[+mC]=GAL4-nos.NGT}40           | BL25751 | -         |
| Mitochondrial dynamics | <i>Drp1</i>             | y1 v1; P{TRiP.HMC03230}attP40                                       | BL51483 | TRiP, V20 |
|                        |                         | w1118; P{UAS-Drp1.miRNA.CDS.S}3/T(2;3)TSTL, CyO: TM6B, Tb1          | BL67160 | miRNA     |
|                        |                         | w1118; P{GD10456}v44155/TM3                                         | v44156  | GD        |
|                        | <i>Marf</i>             | y1 sc* v1; P{TRiP.HMC03883}attP40                                   | BL55189 | TRiP, V20 |
|                        |                         | w1118; P{UAS-Marf.miRNA.CDS.S}3                                     | BL67158 | miRNA     |
|                        |                         | w1118; P{GD11094}v40478                                             | v40478  | GD        |
|                        |                         | w1118; P{KK105681}VIE-260B                                          | v105261 | KK        |
|                        | <i>Opa1</i>             | y1 sc* v1; P{TRiP.HMS00349}attP2                                    | BL32358 | TRiP, V20 |
|                        |                         | w1118; B11/CyO; P{UAS-Opa1.miRNA.CDS}3                              | BL67159 | miRNA     |
|                        |                         | w1118; P{KK105706}VIE-260B                                          | v106290 | KK        |
| TCA cycle              | <i>Scsalpha1</i>        | w1118; P{KK102542}VIE-260B                                          | v107164 | KK        |
|                        | <i>alpha-KGDHC</i>      | w1118; P{KK109081}VIE-260B/cyo;Dr/tm3ser                            | v108403 | KK        |

V20, Valium 20

## 1.2 Supplementary Table 2

**Table 2. Descriptive summary of downregulation effects of mitochondrial dynamics-regulator genes in GSC number, fate and fecundity of female *Drosophila*.**

| Gene                      | Fly line | GSCs in the germarium |                    |                   | Mitochondrial morphology in the germarium |                  | Egg chamber formation                     | Ovary size | Egg morphology                            | Fecundity              |                    |
|---------------------------|----------|-----------------------|--------------------|-------------------|-------------------------------------------|------------------|-------------------------------------------|------------|-------------------------------------------|------------------------|--------------------|
|                           |          | Region 1              |                    |                   | Region 1                                  | Regions 2b-3     |                                           |            |                                           | Egg/female/h (mean±SD) | P-value vs Control |
|                           |          | GSC number (mean±SD)  | P-value vs Control | Germaria analyzed |                                           |                  |                                           |            |                                           |                        |                    |
| <b>Control</b>            | BL35758  | 2.53±0.51             | -                  | 17                | Mostly fissioned                          | Mostly fused     | normal                                    | normal     | normal                                    | 3.04±1.42              | -                  |
| <b><i>Drp1</i></b>        | v44156   | 1.46±0.99             | 0.0002             | 28                | Mostly fused                              | Mostly fused     | Smaller ovarioles; Defects in nurse cells | tiny       | Smaller eggs; Defective dorsal appendages | 0.49±0.38              | < 0.0001           |
|                           | BL51483  | 2.00±1.05             | 0.0603             | 28                | n.d.                                      | n.d.             | n.d.                                      | tiny       | n.d.                                      | n.d.                   | n.d.               |
|                           | BL67160  | 1.65±0.65             | < 0.0001           | 34                | n.d.                                      | n.d.             | n.d.                                      | tiny       | n.d.                                      | n.d.                   | n.d.               |
| <b><i>Marf</i></b>        | v40478   | 2.00±0.65             | 0.0074             | 25                | Mostly fissioned                          | Mostly fissioned | Smaller ovarioles; Defects in nurse cells | tiny       | Smaller eggs; Defective dorsal appendages | 0.05±0.08              | < 0.0001           |
|                           | v105261  | 2.20±0.61             | 0.0894             | 20                | n.d.                                      | n.d.             | n.d.                                      | tiny       | n.d.                                      | n.d.                   | n.d.               |
|                           | BL55189  | 2.81±0.40             | 0.0897             | 16                | n.d.                                      | n.d.             | n.d.                                      | tiny       | n.d.                                      | n.d.                   | n.d.               |
|                           | BL67158  | 1.95±0.71             | 0.0084             | 19                | n.d.                                      | n.d.             | n.d.                                      | tiny       | n.d.                                      | n.d.                   | n.d.               |
| <b><i>Opa1</i></b>        | v106290  | 1.67±0.85             | 0.0004             | 33                | Mostly fissioned                          | Mostly fissioned | Smaller ovarioles; Defects in nurse cells | tiny       | Smaller eggs                              | 0.06±0.10              | < 0.0001           |
|                           | BL32358  | 1.71±0.89             | 0.0009             | 38                | n.d.                                      | n.d.             | n.d.                                      | tiny       | n.d.                                      | n.d.                   | n.d.               |
|                           | BL67159  | 2.23±0.81             | 0.1868             | 26                | n.d.                                      | n.d.             | n.d.                                      | tiny       | n.d.                                      | n.d.                   | n.d.               |
| <b><i>Scsalpha1</i></b>   | v107164  | 2.00±0.96             | 0.0424             | 29                | n.d.                                      | n.d.             | normal                                    | normal     | normal                                    | 3.64±1.61              | >0.10              |
| <b><i>alpha-KGDHC</i></b> | v108403  | 2.05±0.89             | 0.0576             | 20                | n.d.                                      | n.d.             | Smaller ovarioles                         | normal     | normal                                    | 1.33 ±0.65             | < 0.0001           |

n.d., not determined

## 1. Supplementary Figures

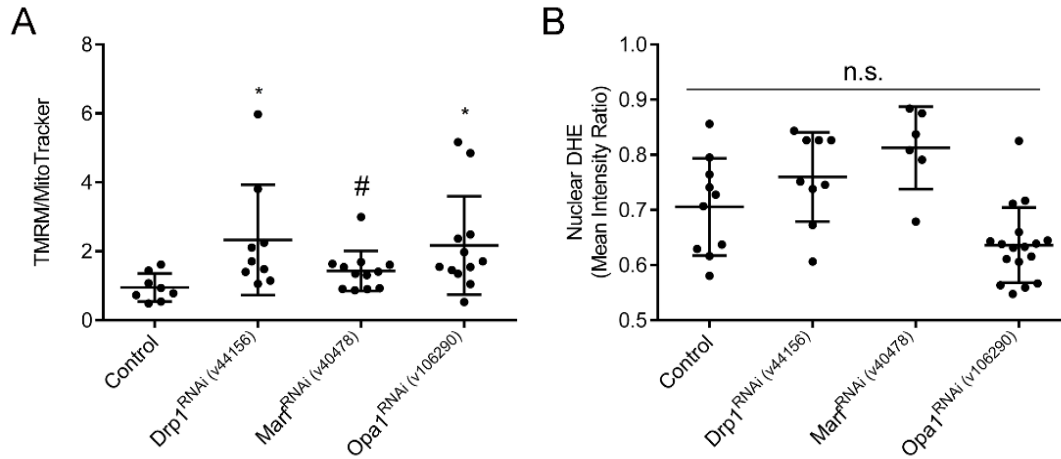

**Supplementary Figure 1. Knock-down of *Drp1*, *Marf* or *Opa1* alters mitochondrial membrane potential but does not induce significant changes in ROS levels in GSCs. (A)** Quantification of TMRM/MitoTracker in region 1 of the germaria of females of the indicated genotypes. TMRM/MitoTracker intensity ratios were calculated in region 1 of germaria expressing *Drp1*<sup>RNAi</sup> (v44156), *Marf*<sup>RNAi</sup> (v40478) or *Opa1*<sup>RNAi</sup> (v106290) in GSCs, under the regulation of *nosGAL4*. Interfering with both fusion or fission regulators significantly increase the mitochondrial membrane potential in GSCs. **(B)** Dihydroethidium (DHE) staining was used to assess the level of ROS upon *Drp1*, *Marf* or *Opa1* depletion in GSCs. The mean intensity of nuclear DHE relative to cytoplasm was quantified in cells within region 1 of the germaria. The resulting data is represented in the graph. Disruption of mitochondrial dynamics (*Drp1*-, *Marf*- or *Opa1*- RNAi) did not lead to an obvious change in ROS when compared to control (*mCherry*<sup>RNAi</sup>). The ratio values, mean and  $\pm$ SD are depicted in the graphs. Statistical significance of differences to control was calculated using *Dunn*'s multiple comparisons test (DHE) or unpaired t-test (TMRM/MitoTracker). \* $P < 0.05$ , \*\* $P < 0.01$ , # $P < 0.10$ , n.s. non-significant.

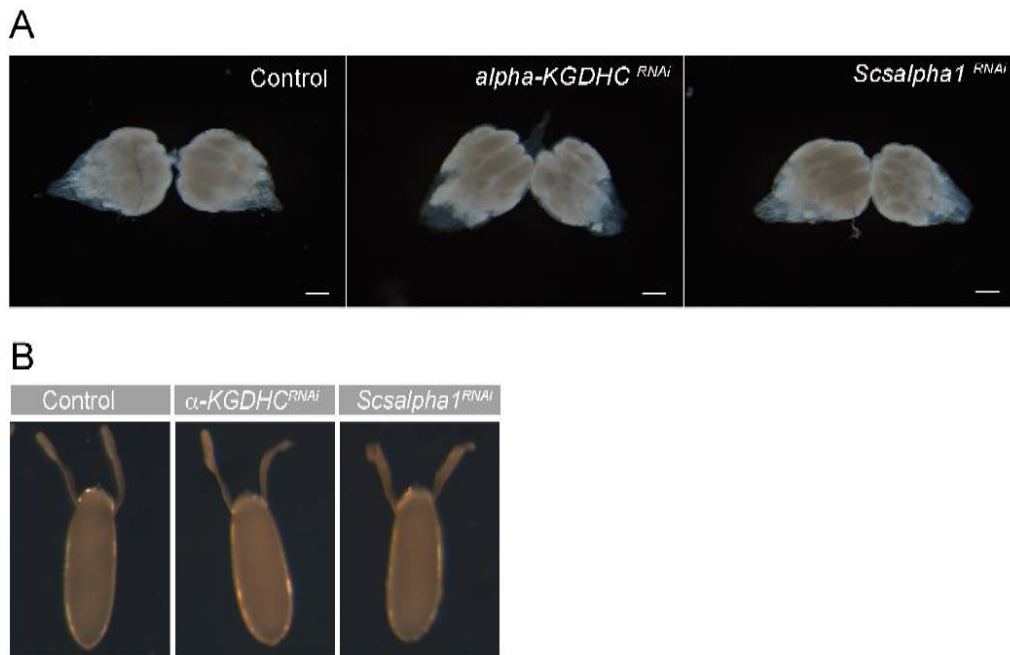

**Supplementary Figure 2. Downregulation of essential TCA cycle enzymes in the germline does not affect ovaries or egg morphology (A)** Bright-field images of whole ovaries of one-day-old female virgins of the indicated genotypes. Germline cells expressing either *Scsalpha<sup>RNAi</sup>* or *alpha-KGDHC<sup>RNAi</sup>* under the control of *nosGal4* generate wild-type like ovaries. Scale bars represent 200  $\mu\text{m}$ . **(B)** Representative images of the eggs produced by females of the indicated genotypes. Eggs produced by *Scsalpha<sup>RNAi</sup>* or *alpha-KGDHC<sup>RNAi</sup>* females are morphologically similar to eggs laid by control flies (*mCherry<sup>RNAi</sup>*).
